# Supplementary material
Source: Springer Nature journal article supplement (https://www.springermedizin.de/resource/supplementary/13102_2010_49_MOESM4_ESM.pdf/9667622)

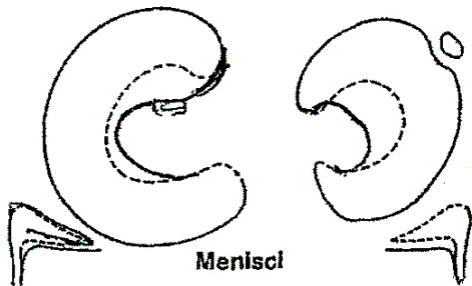

A

**Menisci**

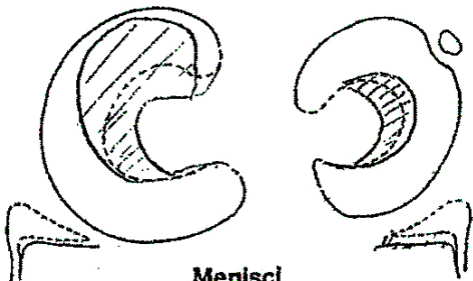

B

**Menisci**

Supplement: MOESM4 [file 9667622]
